# Supplementary material for: A novel chiral electrochemiluminescence sensor that can discriminate proline enantiomers
Source: Royal Society of Chemistry journal article supplement (doi:10.1039/c5ra13528a), 2015-01-01
Supplement: c5ra13528a1.pdf [file c5ra13528a1.pdf]

## **A Novel Chiral electrochemiluminescence sensor discrimination for proline enantiomers**

Qinghong Wang, Xia Lin, Dongmei Guo, Cui Chen, Chunzhi Xuan, Juanjuan Xu,

Yingzi Fu\*

Laboratory of Luminescence and Real-Time Analysis (Southwest University),  
Ministry of Education, College of Chemistry and Chemical Engineering, Southwest  
University, Chongqing 400715, China.

Corresponding author: Yingzi Fu

E-mail address: [fyzc@swu.edu.cn](mailto:fyzc@swu.edu.cn)

Fax: +86-023-68253195;

Tel: +86-023-68252360.

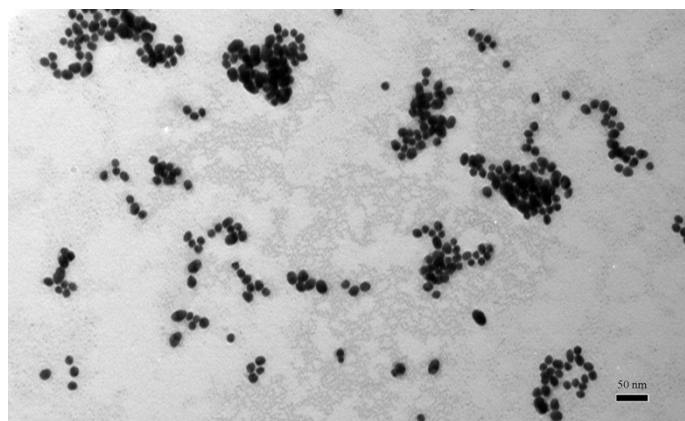

**Fig.S1.** TEM image of citrate-capped AuNPs with a diameter about 12nm

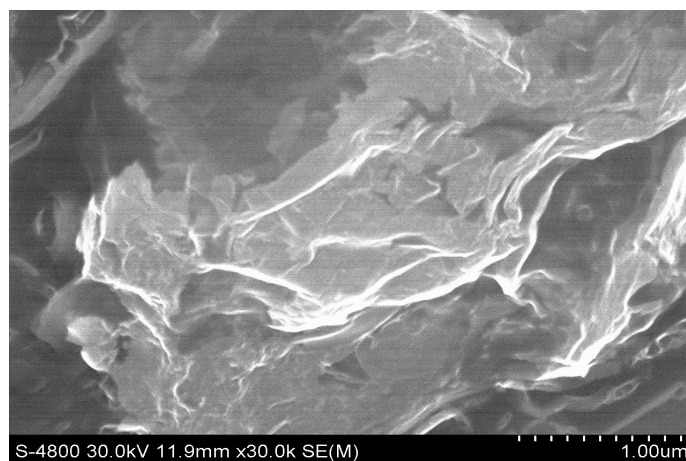

**Fig.S2.** SEM image of  $\beta$ -CD-rGO nanosheets
